# Supplementary material for: Poria cocos Attenuated DSS-Induced Ulcerative Colitis via NF-κB Signaling Pathway and Regulating Gut Microbiota
Source: MDPI journal article supplement (doi:10.3390/molecules29092154), 2024-05-06
Supplement: s1 [file s1]

# ***Poria cocos* attenuated DSS-induced ulcerative colitis via NF-κB signaling pathway and regulating gut microbiota**

Xiaojun Song <sup>1,†</sup>, Wei Wang <sup>1,†</sup>, Yuanxiang Zhang <sup>1</sup>, Li Liu <sup>1</sup>, Zitong Zhao <sup>1</sup>, Xuebin Shen <sup>1</sup>, Lingyun Zhou <sup>1</sup>, Yuanxiang Zhang <sup>1,\*</sup>, Daiyin Peng <sup>2, 3,4,\*</sup> and Sihui Nian <sup>1,5,6,7,\*</sup>

<sup>1</sup> School of Pharmacy, Wannan Medical College, Wuhu 241002, China; 20209071@stu.wnmc.edu.cn (W.W.); 20210027@wnmc.edu.cn (Y.Z.); liulilili@stu.wnmc.edu.cn (L.L.); 20209092@stu.wnmc.edu.cn (Z.Z.); sxb-chn@163.com (X.S.); zly4321@sina.com (L.Z.); tsongxj@wnmc.edu.cn (X.S.); niansihui@126.com (S.N.)

<sup>2</sup> School of Pharmacy, Anhui University of Chinese Medicine, Hefei 230012, China;

<sup>3</sup> Anhui Province Key Laboratory of Chinese Medicinal Formula, Hefei 230012, China;

<sup>4</sup> Xin'an Medicine, Key Laboratory of Chinese Ministry of Education, Anhui University of Chinese Medicine, Hefei 230038, China; pengdaiyin@163.com (D.P.)

<sup>5</sup> Anhui Provincial Engineering Laboratory for Screening and Re-evaluation of Active Compounds of Herbal Medicines in Southern Anhui, Wannan Medical College, Wuhu 241002, China; tsongxj@wnmc.edu.cn (X.S.); niansihui@126.com (S.N.)

<sup>6</sup> Institute of Modern Chinese Medicine, Wannan Medical College, Wuhu 241002, China; niansihui@126.com (S.N.)

<sup>7</sup> Center for Xin'an Medicine and Modernization of Traditional Chinese Medicine of IHM, Wannan Medical College, Wuhu 241002, China; niansihui@126.com (S.N.)

\* Correspondence: 20210027@wnmc.edu.cn (Y.Z.); pengdaiyin@163.com (D.P.); niansihui@126.com (S.N.)

† These authors contributed equally to this work.

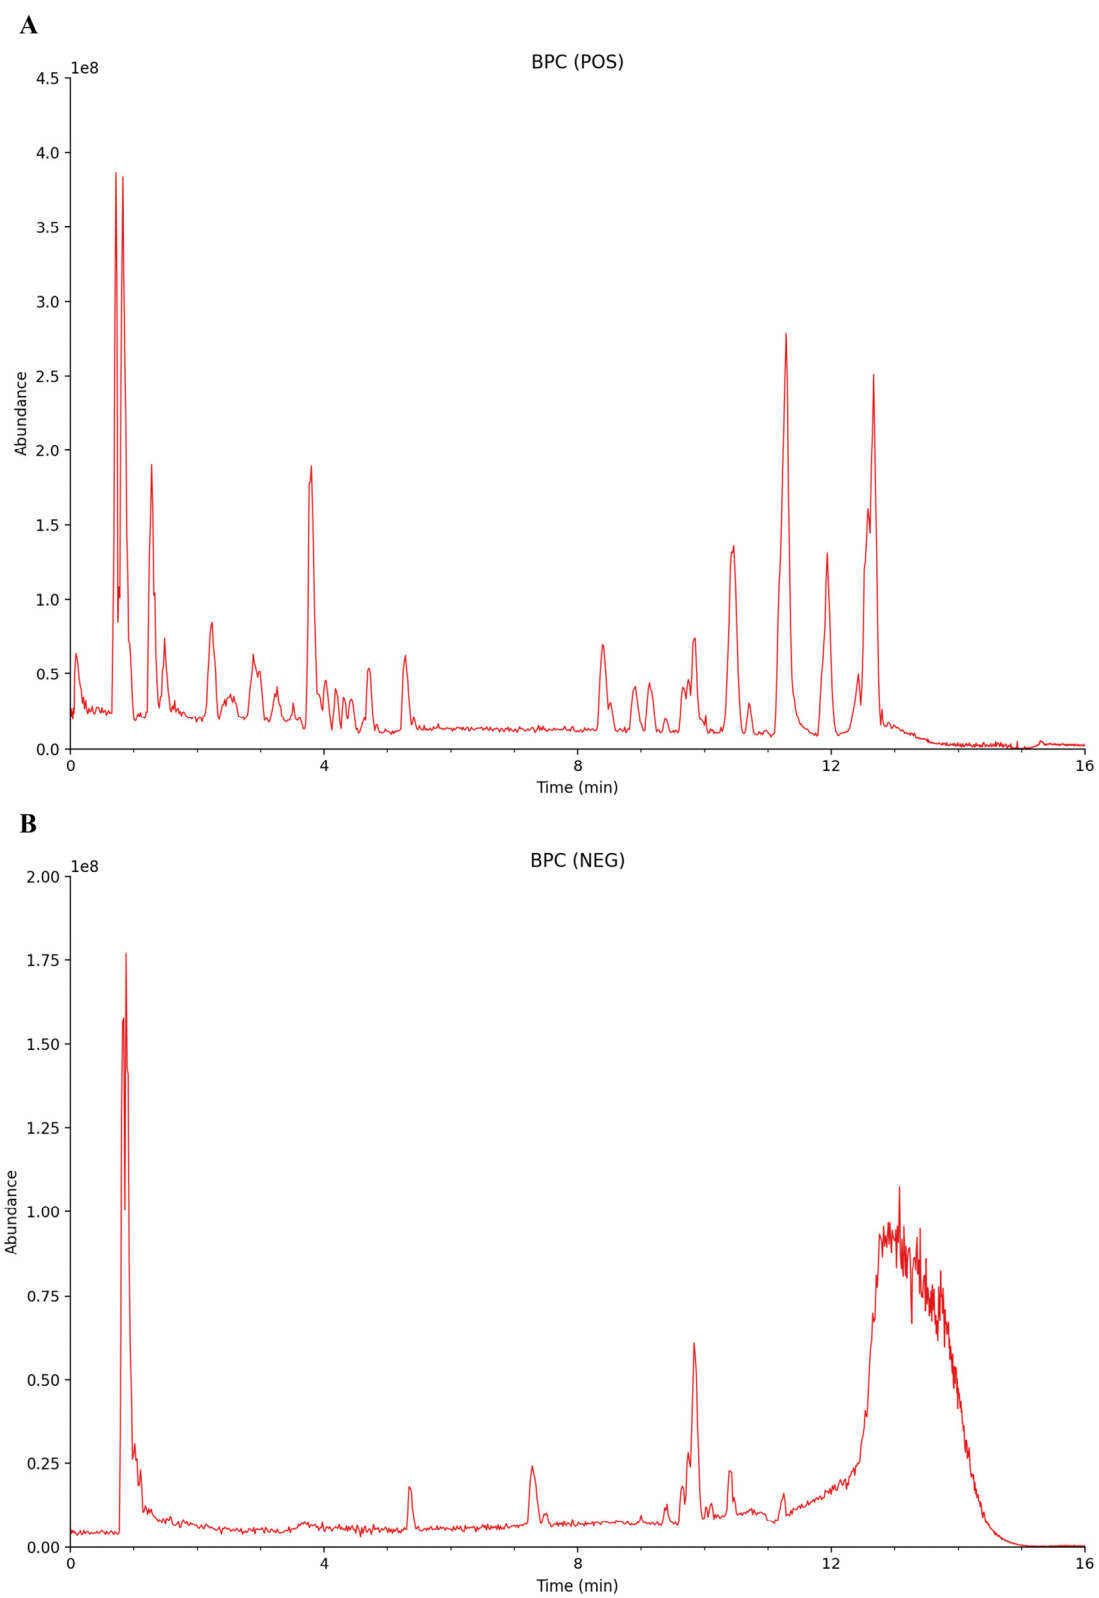

**Figure S1.** Base peak chromatograms of PCE in positive (**A**) and negative (**B**) mode.

A. The expression of Claudin-1 was assessed

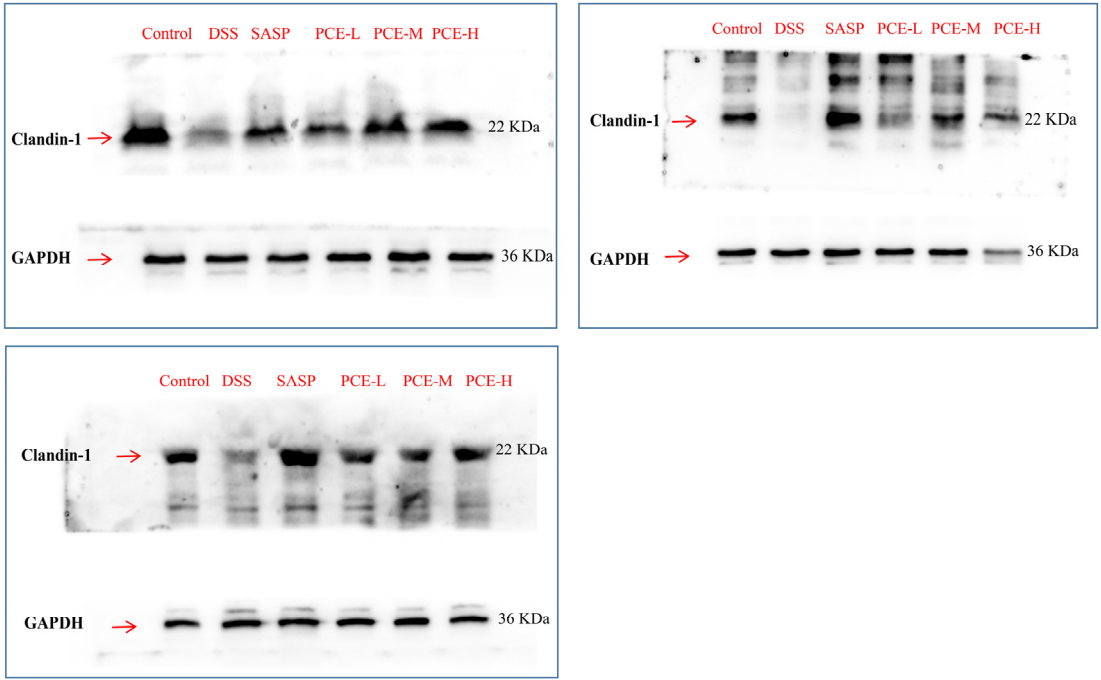

B. The expression of ZO-1 was assessed

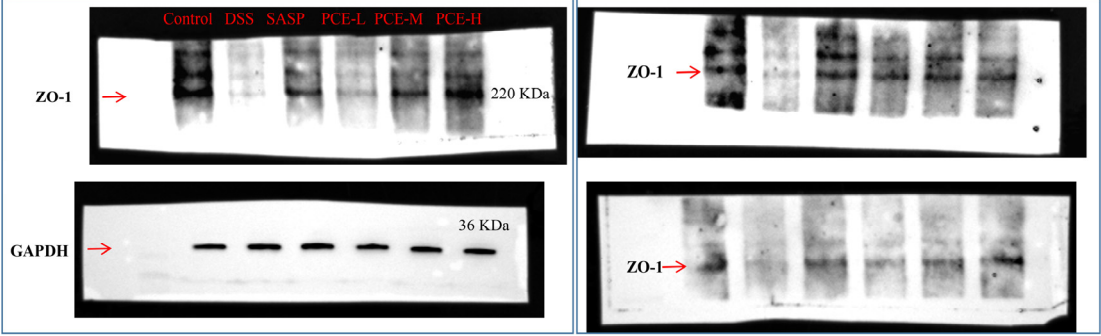

C. The expression of P-IκBα /IκBα was assessed

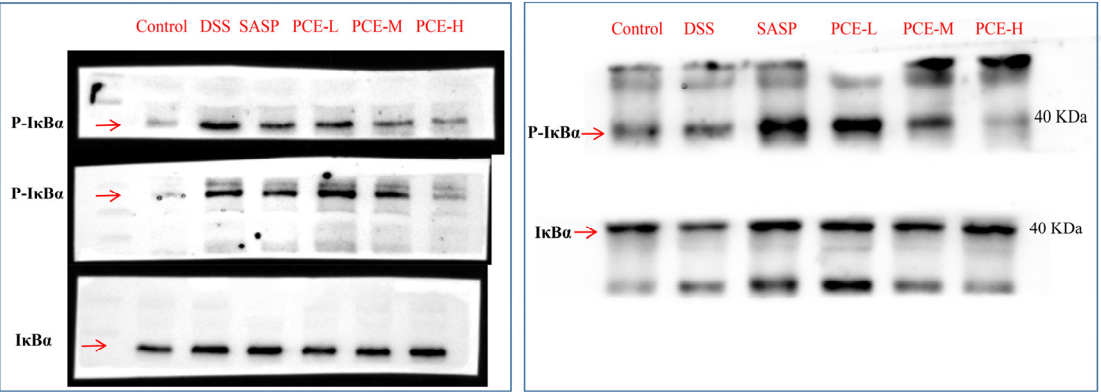

**D. The expression of NF- $\kappa$ B p65 was assessed**

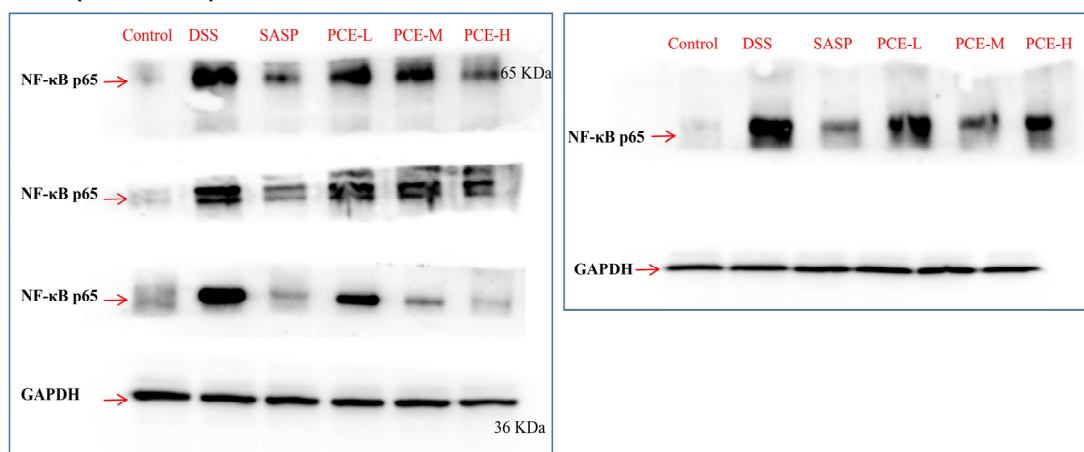

**Figure S2.** The original unadjusted and uncropped western blot images

**Table S1** Characterization of compounds identified from *Poria cocos* by UPLC-Q-Exactive-MS.

| No. | T <sub>R</sub><br>(min) | Selected ion                      | Measured<br>mass | Error<br>(ppm) | Formula                                                      | Fragmentations ( <i>m/z</i> )                                                                   | Identified compounds   | Identification level<br>(A and B) | Type of compounds |
|-----|-------------------------|-----------------------------------|------------------|----------------|--------------------------------------------------------------|-------------------------------------------------------------------------------------------------|------------------------|-----------------------------------|-------------------|
| 1   | 0.73                    | [M+NH <sub>4</sub> ] <sup>+</sup> | 133.0974         | 1.74           | C <sub>5</sub> H <sub>9</sub> NO <sub>2</sub>                | 60.0564, 70.0658, 72.0815, 73.0848, 74.0244, 88.0398, 116.0708                                  | L-Proline              | A                                 | Amino acid        |
| 2   | 0.77                    | [M+H] <sup>+</sup>                | 175.1192         | 1.17           | C <sub>6</sub> H <sub>14</sub> N <sub>4</sub> O <sub>2</sub> | 112.0872, 116.0708, 130.0975, 137.5001, 140.0027, 149.0080, 149.5085, 157.1082, 175.1189        | L-Arginine             | A                                 | Amino acid        |
| 3   | 0.8                     | [M+H] <sup>+</sup>                | 156.0769         | 1.14           | C <sub>6</sub> H <sub>9</sub> N <sub>3</sub> O <sub>2</sub>  | 95.0608, 110.0715, 156.0766                                                                     | L-Histidine            | A                                 | Amino acid        |
| 4   | 0.83                    | [M+H] <sup>+</sup>                | 120.0659         | 2.81           | C <sub>4</sub> H <sub>9</sub> NO <sub>3</sub>                | 56.0503, 74.0607, 102.0552, 120.0655                                                            | L-Threonine            | A                                 | Amino acid        |
| 5   | 0.83                    | [M+H] <sup>+</sup>                | 166.0534         | 0.97           | C <sub>5</sub> H <sub>11</sub> NO <sub>3</sub> S             | 56.0503, 74.0243, 102.0553, 149.0265, 166.0527                                                  | Methionine sulfoxide   | A                                 | Amino acid        |
| 6   | 0.84                    | [M-H] <sup>-</sup>                | 181.072          | 1.05           | C <sub>6</sub> H <sub>14</sub> O <sub>6</sub>                | 71.0139, 73.0296, 85.0296, 89.0245, 101.0245, 113.0245, 119.0350, 131.0350, 163.0614, 181.0719  | Allitol                | A                                 | Carbohydrates     |
| 7   | 0.84                    | [M+H] <sup>+</sup>                | 134.045          | 1.52           | C <sub>4</sub> H <sub>7</sub> NO <sub>4</sub>                | 57.0342, 60.0451, 69.0342, 70.0658, 74.0243, 88.0397, 116.0344, 134.045                         | L-Aspartic acid        | A                                 | Amino Acids       |
| 8   | 0.84                    | [M-H] <sup>-</sup>                | 151.0614         | 1.18           | C <sub>5</sub> H <sub>12</sub> O <sub>5</sub>                | 85.0295, 87.0088, 89.0245, 101.0244, 113.0244, 119.0350, 131.0351, 133.0507, 151.0400, 151.0612 | Arabinitol             | A                                 | Carbohydrates     |
| 9   | 0.86                    | [M+H] <sup>+</sup>                | 153.0759         | 1.01           | C <sub>5</sub> H <sub>12</sub> O <sub>5</sub>                | 71.0498, 73.0291, 99.0444, 117.0548, 152.0567, 152.0699, 153.0404                               | Ribitol                | A                                 | Carbohydrates     |
| 10  | 0.87                    | [M+H] <sup>+</sup>                | 222.0974         | 0.76           | C <sub>8</sub> H <sub>15</sub> NO <sub>6</sub>               | 126.0550, 134.0273, 134.0446, 138.0548, 144.0654, 168.0653, 186.0759, 204.0864, 222.0965        | N-Acetyl-D-glucosamine | A                                 | Carbohydrates     |
| 11  | 0.93                    | [M-H] <sup>+</sup>                | 191.02           | 1.19           | C <sub>6</sub> H <sub>8</sub> O <sub>7</sub>                 | 72.9931, 85.0295, 87.0088, 111.0088, 129.0195, 191.02                                           | Citric acid            | A                                 | Organic acids     |

|    |      |                                     |          |       |                                                                |                                                                                                    |                                       |   |               |
|----|------|-------------------------------------|----------|-------|----------------------------------------------------------------|----------------------------------------------------------------------------------------------------|---------------------------------------|---|---------------|
| 12 | 0.93 | [M+FA-H] <sup>-</sup>               | 289.0677 | -0.3  | C <sub>9</sub> H <sub>12</sub> N <sub>2</sub> O <sub>6</sub>   | 110.0248, 111.0202, 128.0352, 152.0354, 200.0562, 243.0617                                         | Uridine                               | A | Nucleotides   |
| 13 | 0.93 | [M-H] <sup>-</sup>                  | 323.0285 | -0.26 | C <sub>9</sub> H <sub>13</sub> N <sub>2</sub> O <sub>9</sub> P | 78.9591, 96.9601, 96.9696, 111.0201, 124.9914, 138.9801, 211.0017, 323.0278                        | Uridine 5'-monophosphate              | A | Nucleotides   |
| 14 | 0.93 | [M-H] <sup>-</sup>                  | 177.0407 | 1.31  | C <sub>6</sub> H <sub>10</sub> O <sub>6</sub>                  | 101.0246, 113.0254, 117.0194, 129.0197, 133.0298, 147.0304, 158.9256, 176.9364, 177.0187, 177.0412 | 1,4-D-Gulonolactone                   | A | Carbohydrates |
| 15 | 1.21 | [M+H] <sup>+</sup>                  | 130.0501 | 1.94  | C <sub>5</sub> H <sub>7</sub> NO <sub>3</sub>                  | 70.0658, 84.0449, 84.0813, 87.0045, 113.9638, 129.0182, 130.0499                                   | Pyroglutamic acid                     | A | Amino acid    |
| 16 | 1.28 | [M+H-H <sub>2</sub> O] <sup>+</sup> | 145.0497 | 0.88  | C <sub>6</sub> H <sub>10</sub> O <sub>5</sub>                  | 71.0499, 81.0341, 85.0290, 86.0606, 98.0605, 99.0444, 100.0761, 127.0391, 144.0374, 145.0493       | 2-Hydroxyadipic acid                  | A | Fatty acid    |
| 17 | 1.28 | [M+H] <sup>+</sup>                  | 268.1041 | 0.4   | C <sub>10</sub> H <sub>13</sub> N <sub>5</sub> O <sub>4</sub>  | 136.0617, 268.1035                                                                                 | Adenosine                             | A | Nucleotides   |
| 18 | 1.37 | [M+H] <sup>+</sup>                  | 284.099  | 0.22  | C <sub>10</sub> H <sub>13</sub> N <sub>5</sub> O <sub>5</sub>  | 152.0566                                                                                           | Guanosine                             | A | Nucleotides   |
| 19 | 1.39 | [M+H] <sup>+</sup>                  | 260.197  | 0.66  | C <sub>12</sub> H <sub>25</sub> N <sub>3</sub> O <sub>3</sub>  | 101.1077, 129.1023, 130.0499, 147.0763, 147.1127, 148.0603, 243.1703, 259.1305, 260.1601, 260.1968 | Lysylleucine                          | A | Peptide       |
| 20 | 1.49 | [M+H] <sup>+</sup>                  | 132.1021 | 1.52  | C <sub>6</sub> H <sub>13</sub> NO <sub>2</sub>                 | 69.0342, 69.0705, 86.0605, 86.0969, 87.0445, 97.0288, 115.0755                                     | L-Leucine                             | A | Amino acid    |
| 21 | 2.24 | [M+H] <sup>+</sup>                  | 328.1392 | 0.22  | C <sub>15</sub> H <sub>21</sub> NO <sub>7</sub>                | 120.081, 132.0808, 166.0862, 178.086, 264.1233, 292.1176, 310.1282, 328.1392                       | N-(1-Deoxy-1-fructosyl) phenylalanine | A | Amino acid    |
| 22 | 2.61 | [M+H] <sup>+</sup>                  | 246.145  | 0.65  | C <sub>10</sub> H <sub>19</sub> N <sub>3</sub> O <sub>4</sub>  | 200.1395, 201.1237, 211.1080, 212.0913, 228.1342, 229.1183, 245.0993, 246.0739, 246.1119, 246.1390 | Asparaginyllisoleucine                | A | Peptide       |
| 23 | 2.81 | [M+H] <sup>+</sup>                  | 281.1497 | 0.34  | C <sub>14</sub> H <sub>20</sub> N <sub>2</sub> O <sub>4</sub>  | 55.0551, 72.0815, 120.0809, 136.0613, 136.0758, 149.0235, 182.0811, 281.1491                       | Valyltyrosine                         | A | Peptide       |

|    |      |                                     |          |       |                                                               |                                                                                                              |                                 |   |            |
|----|------|-------------------------------------|----------|-------|---------------------------------------------------------------|--------------------------------------------------------------------------------------------------------------|---------------------------------|---|------------|
| 24 | 2.88 | [M+H] <sup>+</sup>                  | 189.1235 | 0.64  | C <sub>8</sub> H <sub>16</sub> N <sub>2</sub> O <sub>3</sub>  | 86.0969, 97.1017, 125.0963, 132.1019, 143.1177, 189.1016, 189.125                                            | Glycyl-Isoleucine               | A | Peptide    |
| 25 | 3.6  | [M+H] <sup>+</sup>                  | 253.1186 | 1.09  | C <sub>12</sub> H <sub>16</sub> N <sub>2</sub> O <sub>4</sub> | 60.0452, 70.0658, 86.0969, 120.081, 166.0862, 207.1126, 235.1072, 253.1185                                   | Serylphenylalanine              | A | Peptide    |
| 26 | 3.71 | [M+H] <sup>+</sup>                  | 231.1706 | 1.28  | C <sub>11</sub> H <sup>22</sup> N <sub>2</sub> O <sub>3</sub> | 70.0658, 72.0814, 86.0969, 185.1655, 231.1705                                                                | Isoleucyl-Valine                | A | Peptide    |
| 27 | 3.93 | [M+H] <sup>+</sup>                  | 231.1707 | 1.68  | C <sub>11</sub> H <sub>22</sub> N <sub>2</sub> O <sub>3</sub> | 72.0814, 132.1019, 231.17                                                                                    | Valylleucine                    | A | Peptide    |
| 28 | 4.23 | [M+H] <sup>+</sup>                  | 265.155  | 1.34  | C <sub>14</sub> H <sub>20</sub> N <sub>2</sub> O <sub>3</sub> | 55.0551, 72.0814, 102.0553, 120.0809, 146.06, 166.0857, 265.1544                                             | Valylphenylalanine              | A | Peptide    |
| 29 | 5.82 | [M+H] <sup>+</sup>                  | 595.2018 | -0.52 | C <sub>28</sub> H <sub>34</sub> O <sub>14</sub>               | 161.0594, 171.0284, 195.0291, 263.0549, 287.0910, 329.1022, 397.1285, 415.1377, 433.1492, 449.1445, 595.2018 | Didymin                         | A | Flavonoid  |
| 30 | 6.01 | [M-H] <sup>-</sup>                  | 201.1134 | 0.96  | C <sub>10</sub> H <sub>18</sub> O <sub>4</sub>                | 132.0564, 139.1128, 156.1026, 157.1232, 175.0625, 183.1024, 201.113                                          | Sebacic acid                    | A | Fatty acid |
| 31 | 6.75 | [M-H] <sup>-</sup>                  | 215.1289 | -0.04 | C <sub>11</sub> H <sub>20</sub> O <sub>4</sub>                | 153.1283, 197.1183, 215.0098, 215.1284                                                                       | Undecanedioic acid              | A | Fatty acid |
| 32 | 6.94 | [M+H-H <sub>2</sub> O] <sup>+</sup> | 459.3101 | -0.74 | C <sub>28</sub> H <sub>44</sub> O <sub>6</sub>                | 459.3101                                                                                                     | Polyporusterone B               | B | Steroid    |
| 33 | 7.4  | [M+H-H <sub>2</sub> O] <sup>+</sup> | 443.279  | -0.35 | C <sub>27</sub> H <sub>40</sub> O <sub>6</sub>                | 293.2263, 311.2364, 375.2116, 407.2573, 425.2682, 443.2793                                                   | Lucidenic acid N                | A | Triterpene |
| 34 | 9.43 | [M+H] <sup>+</sup>                  | 501.3574 | -0.08 | C <sub>31</sub> H <sub>48</sub> O <sub>5</sub>                | 109.1016, 309.2211, 437.3416, 465.3379, 483.3476, 501.3578                                                   | 29-hydroxydehydrotumulosic acid | B | Triterpene |
| 35 | 9.78 | [M+H-H <sub>2</sub> O] <sup>+</sup> | 471.347  | 0.19  | C <sub>30</sub> H <sub>48</sub> O <sub>5</sub>                | 173.1325, 187.1481, 295.2414, 311.2357, 313.2524, 411.2519, 435.3256, 453.3361, 471.3466                     | Caulophyllogenin                | A | Triterpene |

|    |       |                                     |          |       |                                                |                                                                                                    |                                          |   |            |
|----|-------|-------------------------------------|----------|-------|------------------------------------------------|----------------------------------------------------------------------------------------------------|------------------------------------------|---|------------|
| 36 | 9.84  | [M+H-H <sub>2</sub> O] <sup>+</sup> | 481.3311 | -0.29 | C <sub>31</sub> H <sub>46</sub> O <sub>5</sub> | 221.1324, 223.1476, 267.1750, 307.2043, 309.2208, 325.2166, 417.3165, 445.3123, 463.3246, 481.3364 | 6 $\alpha$ -Hydroxypolyporenic acid C    | B | Triterpene |
| 37 | 9.96  | [M+Na] <sup>+</sup>                 | 537.3202 | 3.04  | C <sub>31</sub> H <sub>46</sub> O <sub>6</sub> | 431.2968, 459.2907, 477.2989, 491.3156, 519.3114, 537.3225                                         | Poricoic acid D                          | B | Triterpene |
| 38 | 10.04 | [M+FA-H] <sup>-</sup>               | 545.3488 | 0.82  | C <sub>31</sub> H <sub>48</sub> O <sub>5</sub> | 59.0139, 75.0087, 85.0659, 429.2661, 447.2751, 499.3433, 545.3464                                  | 25-hydroxy-3-epidehydrotumulosic acid    | B | Triterpene |
| 39 | 10.33 | [M+H] <sup>+</sup>                  | 469.3316 | 0.79  | C <sub>30</sub> H <sub>46</sub> O <sub>5</sub> | 95.0859, 223.148, 293.226, 311.2366, 433.3099, 451.3201, 469.3315                                  | Quillaic acid                            | A | Triterpene |
| 40 | 10.63 | [M+H-H <sub>2</sub> O] <sup>+</sup> | 467.3158 | 0.42  | C <sub>30</sub> H <sub>44</sub> O <sub>5</sub> | 293.2257, 307.2055, 325.2158, 353.2476, 407.2555, 431.2941, 449.3035, 449.3430, 466.3396, 467.3143 | Poricoic acid B                          | A | Triterpene |
| 41 | 10.88 | [M+H] <sup>+</sup>                  | 499.3418 | 0.01  | C <sub>31</sub> H <sub>46</sub> O <sub>5</sub> | 307.2060, 309.2206, 313.2752, 325.2152, 439.3222, 445.3099, 463.3225, 481.3320, 499.3358, 499.3483 | Poricoic acid A                          | A | Triterpene |
| 42 | 10.89 | [M-H] <sup>-</sup>                  | 497.3272 | -0.04 | C <sub>31</sub> H <sub>46</sub> O <sub>5</sub> | 423.2887, 497.3271                                                                                 | Poricoic acid BM                         | B | Triterpene |
| 43 | 10.94 | [M+H] <sup>+</sup>                  | 487.342  | 0.43  | C <sub>30</sub> H <sub>46</sub> O <sub>5</sub> | 173.1325, 185.1325, 309.2209, 327.2317, 433.3105, 451.3194, 468.3546, 469.3230, 487.3452, 487.3509 | Poricoic acid G                          | B | Triterpene |
| 44 | 11.12 | [M+H] <sup>+</sup>                  | 485.363  | 0.95  | C <sub>31</sub> H <sub>48</sub> O <sub>4</sub> | 159.1170, 293.2261, 311.2362, 449.2987, 449.3427, 466.3399, 467.3058, 467.3500, 484.3590, 485.3661 | Dehydrotumulosic acid                    | A | Triterpene |
| 45 | 11.2  | [M+H] <sup>+</sup>                  | 487.3789 | 1.51  | C <sub>31</sub> H <sub>50</sub> O <sub>4</sub> | 295.2427, 451.3553, 469.3652, 487.3761                                                             | Tumulosic acid                           | B | Triterpene |
| 46 | 11.22 | [M+H] <sup>+</sup>                  | 483.3468 | -0.12 | C <sub>31</sub> H <sub>46</sub> O <sub>4</sub> | 223.1479, 309.2206, 447.3298, 465.3406, 483.3468                                                   | Polyporenic acid C                       | A | Triterpene |
| 47 | 11.23 | [M+H] <sup>+</sup>                  | 543.368  | -0.03 | C <sub>33</sub> H <sub>50</sub> O <sub>6</sub> | 277.1786, 293.2258, 295.2418, 353.2473, 447.3271, 465.3362, 483.3495, 507.3467, 525.3582, 543.3691 | 29-hydroxydehydropachymic acid           | B | Triterpene |
| 48 | 11.48 | [M+FA-H] <sup>-</sup>               | 587.3952 | -0.23 | C <sub>35</sub> H <sub>56</sub> O <sub>7</sub> | 541.3528, 587.3963                                                                                 | 6 $\alpha$ -Hydroxy-dehydropachymic acid | B | Triterpene |



|    |       |                    |          |       |                                                |                   |                                                  |   |            |
|----|-------|--------------------|----------|-------|------------------------------------------------|-------------------|--------------------------------------------------|---|------------|
| 49 | 11.72 | [M-H] <sup>-</sup> | 511.3428 | -0.22 | C <sub>32</sub> H <sub>48</sub> O <sub>5</sub> | 511.3428          | Poricoic acid AM                                 | B | Triterpene |
| 50 | 11.87 | [M-H] <sup>-</sup> | 525.3586 | 0.09  | C <sub>33</sub> H <sub>50</sub> O <sub>5</sub> | 59.0139, 525.3583 | Poricoic acid AE                                 | B | Triterpene |
| 51 | 12.07 | [M-H] <sup>-</sup> | 513.3584 | -0.29 | C <sub>32</sub> H <sub>50</sub> O <sub>5</sub> | 513.3584          | 3-O-Acetyl-16 $\alpha$ -hydroxytrametenolic acid | B | Triterpene |
| 52 | 12.4  | [M-H] <sup>-</sup> | 527.3742 | -0.01 | C <sub>33</sub> H <sub>52</sub> O <sub>5</sub> | 527.3742          | Pachymic acid                                    | B | Triterpene |

\* A denotes the compound was identified using a pure standard, while B indicates putative identification based on data from an online database.

**Table S2.** The standard curve of glucose was established by anthrone-vitriol method

|                              |                                           |        |        |        |        |
|------------------------------|-------------------------------------------|--------|--------|--------|--------|
| <b>1%Glucose solution/ml</b> | 0                                         | 0.2    | 0.4    | 0.6    | 0.8    |
| <b>Water/ml</b>              | 1.0                                       | 0.8    | 0.6    | 0.4    | 0.2    |
| <b>Absorbance value</b>      | 0                                         | 0.7583 | 1.4942 | 2.1136 | 2.8063 |
| <b>Standard curve</b>        | $y = 3.5606x + 0.0256$ ( $R^2 = 0.9989$ ) |        |        |        |        |

**Table S3.** The quantification of the content of PC polysaccharides.

|                                  |          |          |          |          |          |          |          |          |
|----------------------------------|----------|----------|----------|----------|----------|----------|----------|----------|
| <b>Group</b>                     | <b>1</b> | <b>2</b> | <b>3</b> | <b>4</b> | <b>5</b> | <b>6</b> | <b>7</b> | <b>8</b> |
| <b>Absorbance value</b>          | 1.2416   | 1.1885   | 1.1094   | 1.0577   | 1.2462   | 1.1444   | 1.1105   | 1.2288   |
| <b>Average value</b>             | 1.1659   |          |          |          |          |          |          |          |
| <b>Content of polysaccharide</b> | 80.06%   |          |          |          |          |          |          |          |

**Table S4.** Primer sequence for qPCR.

| <b>Gene name</b> | <b>Forward Primer</b>   | <b>Reverse Primer</b> |
|------------------|-------------------------|-----------------------|
| TNF- $\alpha$    | ACCCTCACACTCAGATCATCTTC | TGGTGGTTTGCTACGACGT   |
| IL-6             | CCAGTTGCCTTCTTGGGACT    | CTGGTCTGTTGTGGGTGGTA  |
| IL-1 $\beta$     | AGCAACAACATAAGCGTCAT    | CCTCAAACCTGGCAATACTC  |
| GAPDH            | GAAGGTCGGTGTGAACGGAT    | CCCATTTGATGTTAGCGGGAT |
